# Supplementary material
Source: publisher figshare collection journal article supplement (https://karger.figshare.com/ndownloader/files/20759052)
Supplement: Supplementary file 1 [file 20759052]

Central congenital hypothyroidism caused by a novel mutation, C47W, in the cysteine knot region of TSH $\beta$

Reham S. Ebrhim<sup>1\*</sup>, Ryan J. Bruellman<sup>2\*</sup>, Yui Watanabe<sup>2\*</sup>, Matthew K. Creech<sup>2</sup>, Mohamed A. Abdullah<sup>3</sup>, Alexandra M. Dumitrescu<sup>4</sup>, Samuel Refetoff<sup>4,5,6</sup>, Roy E. Weiss<sup>2</sup>

<sup>1</sup>Department of Pediatrics and Child Health, Faculty of Medicine, University of Almagharibeen, Khartoum, Sudan; <sup>2</sup>Department of Medicine, University of Miami Miller School of Medicine, Miami, Florida; <sup>3</sup>Department of Pediatrics and Child Health, Faculty of Medicine, University of Khartoum, Khartoum, Sudan; Departments of <sup>4</sup>Medicine, <sup>5</sup>Pediatrics and <sup>6</sup>Committee on Genetics The University of Chicago, Chicago, Illinois.

Supplemental Table 1. List of known genes related to thyroid disorders.

Supplemental Figure 1. Protein modeling in silico was performed for TSH $\beta$ , wild type (left) and mutant (right). Mutation site (in red) causes significant change in the three-dimensional predicted structure as shown. Methodology for modeling: Kallberg M, Wang H, Wang S, Peng J, Wang Z, Lu H, Xu. Template-based protein structure modeling using the RaptorX web server. Nat Protoc 2012;7:1511-1522. Ma J, Peng J, Wang S, Xu J. A conditional neural fields model for protein threading. Bioinformatics 2012;28:i59-i66. Ma J, Wang S, Zhao F, Xu J. Protein threading using context-specific alignment potential. Bioinformatics 2013;29:i257-i265.

| Genes Related to thyroid disorder |               |              |               |               |                 |                 |               |              |
|-----------------------------------|---------------|--------------|---------------|---------------|-----------------|-----------------|---------------|--------------|
| <i>AADAT</i>                      | <i>DUOX1</i>  | <i>GNAS</i>  | <i>KMT2D</i>  | <i>POU1F1</i> | <i>RYR2</i>     | <i>SLC30A10</i> | <i>THRB</i>   | <i>TTR</i>   |
| <i>ALB</i>                        | <i>DUOXA1</i> | <i>HHEX</i>  | <i>NCOR2</i>  | <i>PROPI</i>  | <i>SALL1</i>    | <i>SLC5A5</i>   | <i>TPO</i>    | <i>TUBB1</i> |
| <i>ALMS1</i>                      | <i>DUOX2</i>  | <i>HOXA3</i> | <i>NKX2-1</i> | <i>PSMA1</i>  | <i>SECISBP2</i> | <i>SLCO1C1</i>  | <i>TRH</i>    | <i>UBR1</i>  |
| <i>ATXN2</i>                      | <i>DUOXA2</i> | <i>IGSF1</i> | <i>NKX2-5</i> | <i>PSMA3</i>  | <i>SERPINA7</i> | <i>STAMBP</i>   | <i>TRHR</i>   | <i>VAV3</i>  |
| <i>CDC48</i>                      | <i>EXOSC2</i> | <i>IRS4</i>  | <i>NKX2-6</i> | <i>PSMD2</i>  | <i>SLC16A2</i>  | <i>TBL1X</i>    | <i>TRIP11</i> |              |
| <i>DIO1</i>                       | <i>FGF8</i>   | <i>IYD</i>   | <i>NTN1</i>   | <i>PSMD3</i>  | <i>SLC17A4</i>  | <i>TBX1</i>     | <i>TRIP12</i> |              |
| <i>DIO2</i>                       | <i>FOXE1</i>  | <i>JAG1</i>  | <i>P4HB</i>   | <i>PTH1R</i>  | <i>SLC26A4</i>  | <i>TG</i>       | <i>TSHB</i>   |              |
| <i>DIO3</i>                       | <i>GLIS3</i>  | <i>KDM6A</i> | <i>PAX8</i>   | <i>PTRH2</i>  | <i>SLC26A7</i>  | <i>THRA</i>     | <i>TSHR</i>   |              |

## TSHB Protein Modeling

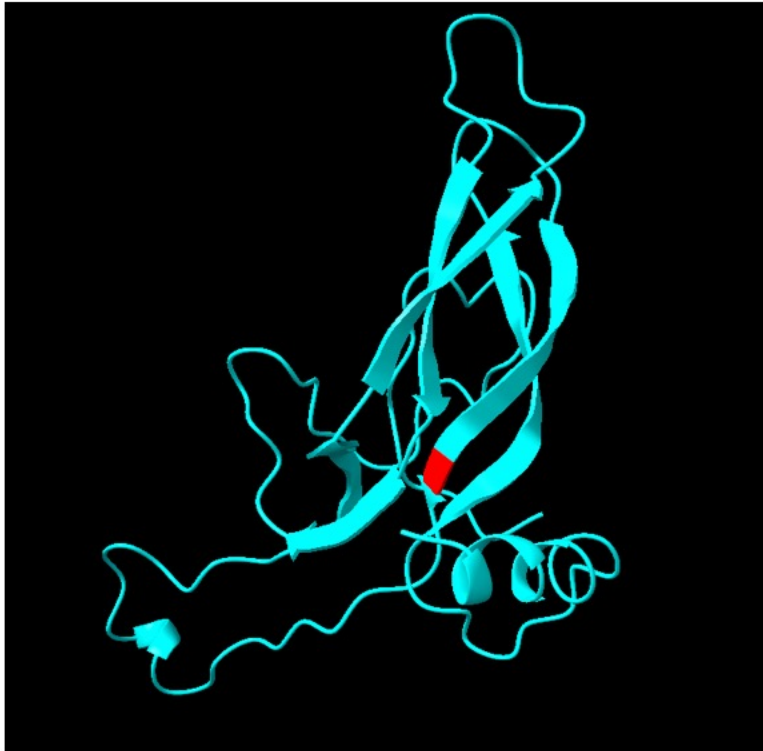

Wild Type

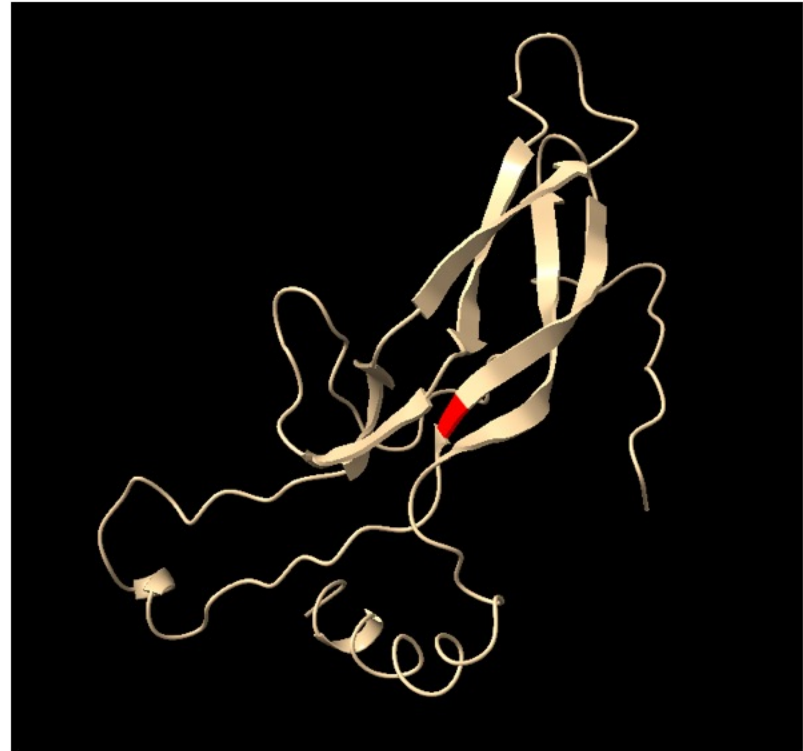

c.T141G p.C47W
